# Supplementary material
Source: PubMed Central journal article supplement (PMC4605878)
Supplement: NIHMS721165-supplement-1.pdf [file NIHMS721165-supplement-1.pdf]

# Supplemental Data

A

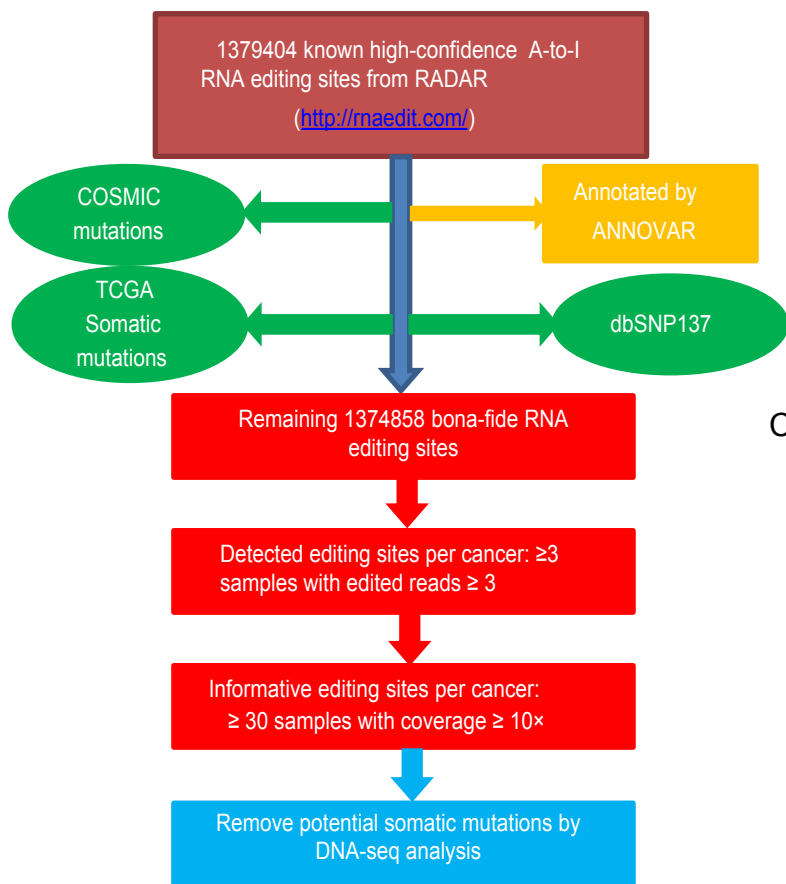

B

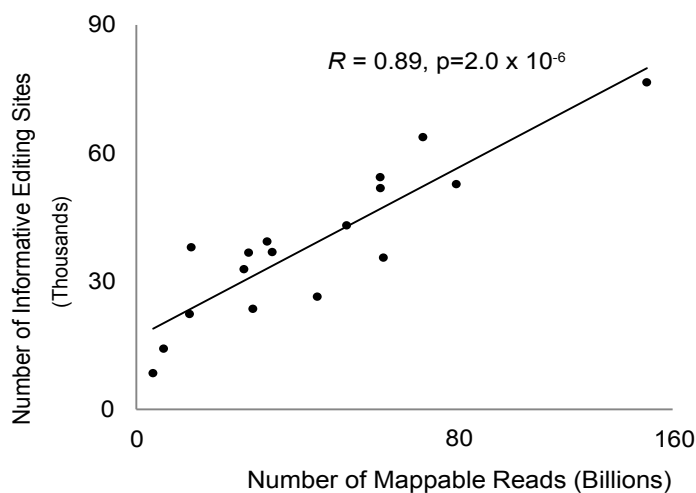

C

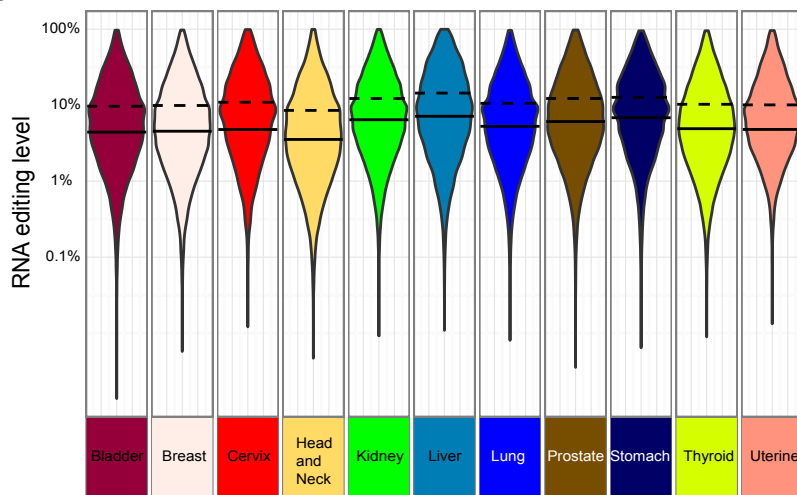

D

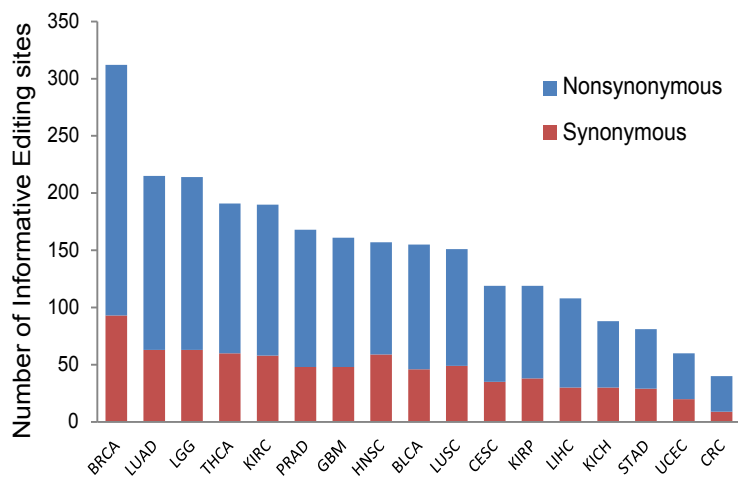

E

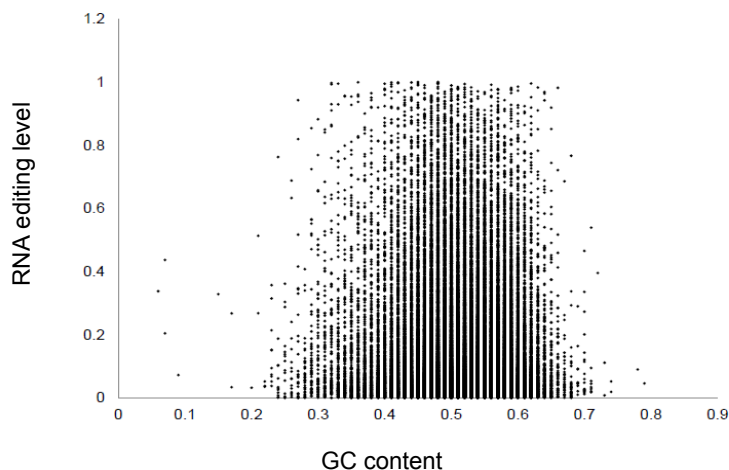

## Figure S1 Overview of A-to-I RNA editing patterns in human cancer and normal tissues. Related to Figure 1.

(A) The RNA editing analysis pipeline. (B) A correlation between the number of total mappable RNA-seq reads and the number of informative RNA editing sites across different cancer types. (C) The editing-level distributions across informative editing sites in different normal tissues. Dashed and solid lines denote average and median for each cancer type, respectively. (D) The numbers of nonsynonymous and synonymous RNA editing sites in different cancer types. (E) No correlation between RNA editing level and the local GC content in BRCA (Pearson correlation  $R = -0.03$ ).

**Table S1, related to Figure 2**

Correlations between the expression levels of ADAR enzymes and the number of RNA editing sites per sample

| <b>Cancer Type</b> | <b># Samples</b> | <b>ADAR1 Rs</b> | <b>ADAR1 p</b> | <b>ADAR2 Rs</b> | <b>ADAR2 p</b> | <b>ADAR3 Rs</b> | <b>ADAR3 p</b> |
|--------------------|------------------|-----------------|----------------|-----------------|----------------|-----------------|----------------|
| <b>BLCA</b>        | 252              | 0.395           | 7.43E-11       | 0.067           | 0.288          | -0.074          | 0.242          |
| <b>BRCA</b>        | 837              | 0.36            | <2e-16         | -0.054          | 0.121          | 0.095           | 0.006          |
| <b>CRC</b>         | 228              | 0.42            | 3.58E-11       | 0.086           | 0.198          | 0.116           | 0.08           |
| <b>GBM</b>         | 154              | 0.362           | 4.04E-06       | 0.158           | 0.051          | 0.05            | 0.538          |
| <b>HNSC</b>        | 425              | 0.367           | 5.82E-15       | -0.049          | 0.311          | 0.314           | 3.63E-11       |
| <b>KICH</b>        | 66               | 0.34            | 5.00E-03       | -0.107          | 0.393          | -0.098          | 0.436          |
| <b>KIRC</b>        | 448              | 0.3             | 8.71E-11       | 0.228           | 1.06E-06       | 0.096           | 0.043          |
| <b>KIRP</b>        | 198              | 0.439           | 1.47E-10       | 0.206           | 0.004          | -0.069          | 0.336          |
| <b>LGG</b>         | 486              | 0.383           | <2e-16         | 0.098           | 0.03           | 0.011           | 0.805          |
| <b>LIHC</b>        | 200              | 0.341           | 7.52E-07       | 0.05            | 0.48           | 0.001           | 0.987          |
| <b>LUAD</b>        | 488              | 0.205           | 5.14E-06       | 0.116           | 0.01           | 0.157           | 0.00049        |
| <b>PRAD</b>        | 374              | 0.597           | <2e-16         | 0.079           | 0.126          | 0.152           | 0.003          |
| <b>THCA</b>        | 498              | 0.259           | 4.76E-09       | 0.091           | 0.041          | 0.076           | 0.091          |
| <b>UCEC</b>        | 314              | 0.376           | 5.63E-12       | 0.053           | 0.348          | -0.059          | 0.293          |

**Table S2, related to Figure 3. Provided as an Excel file.**

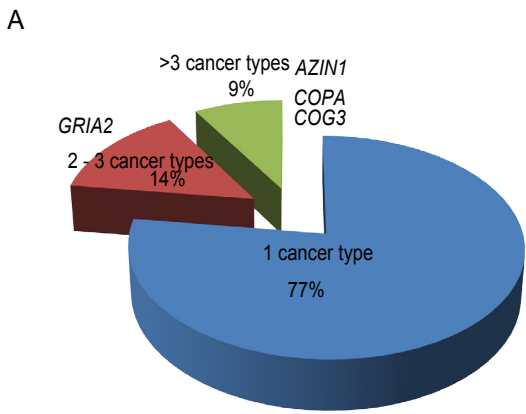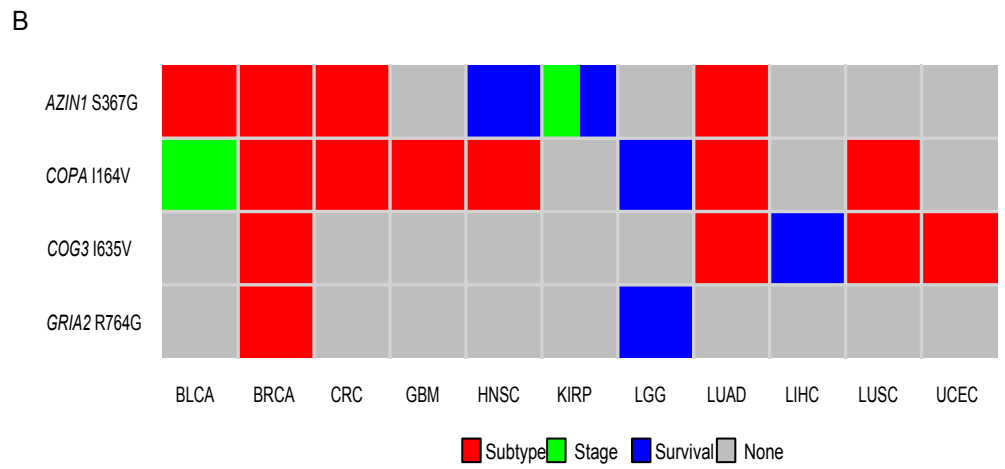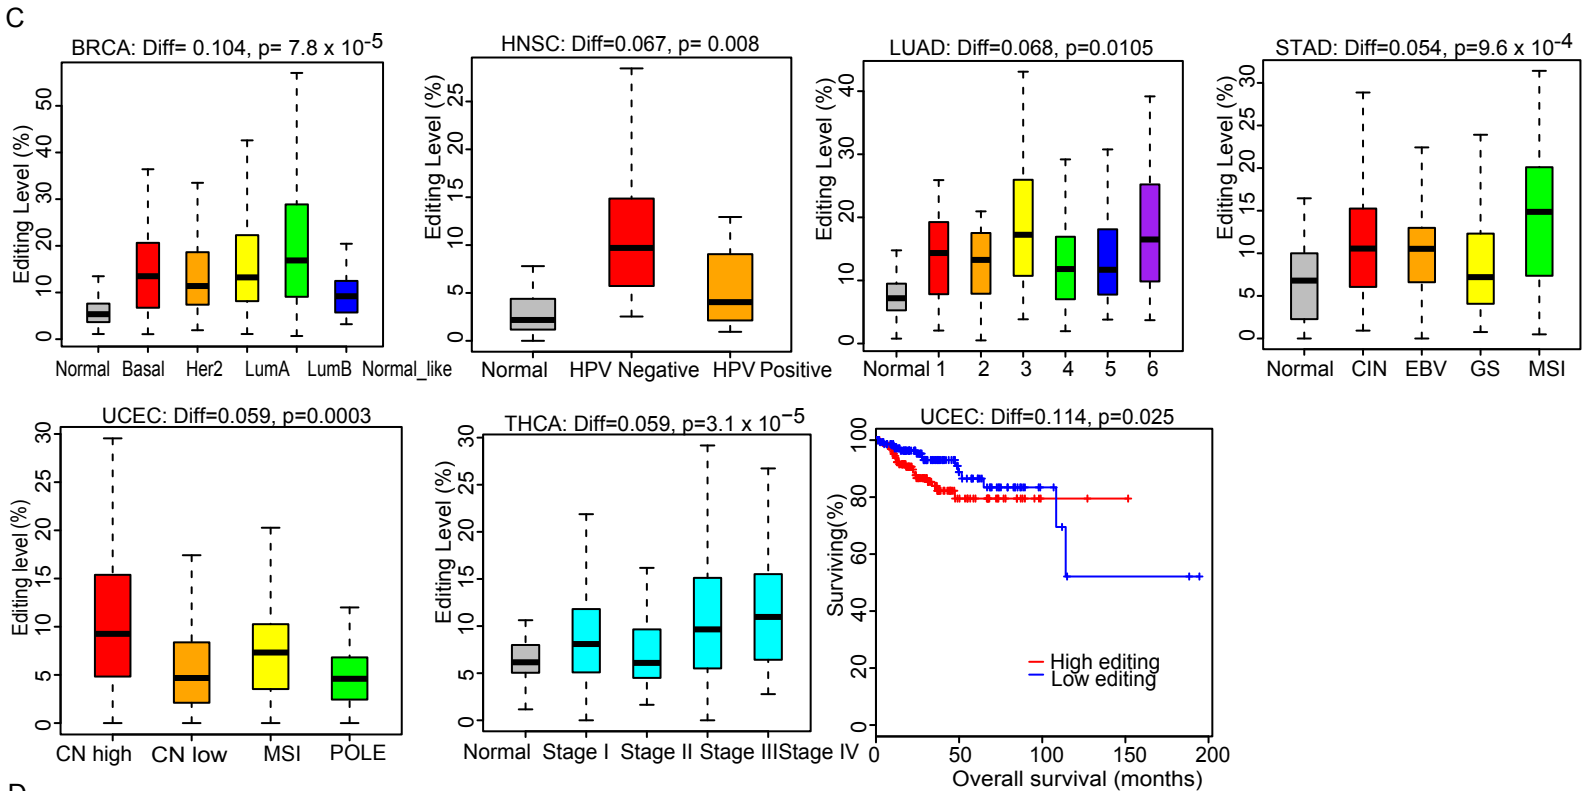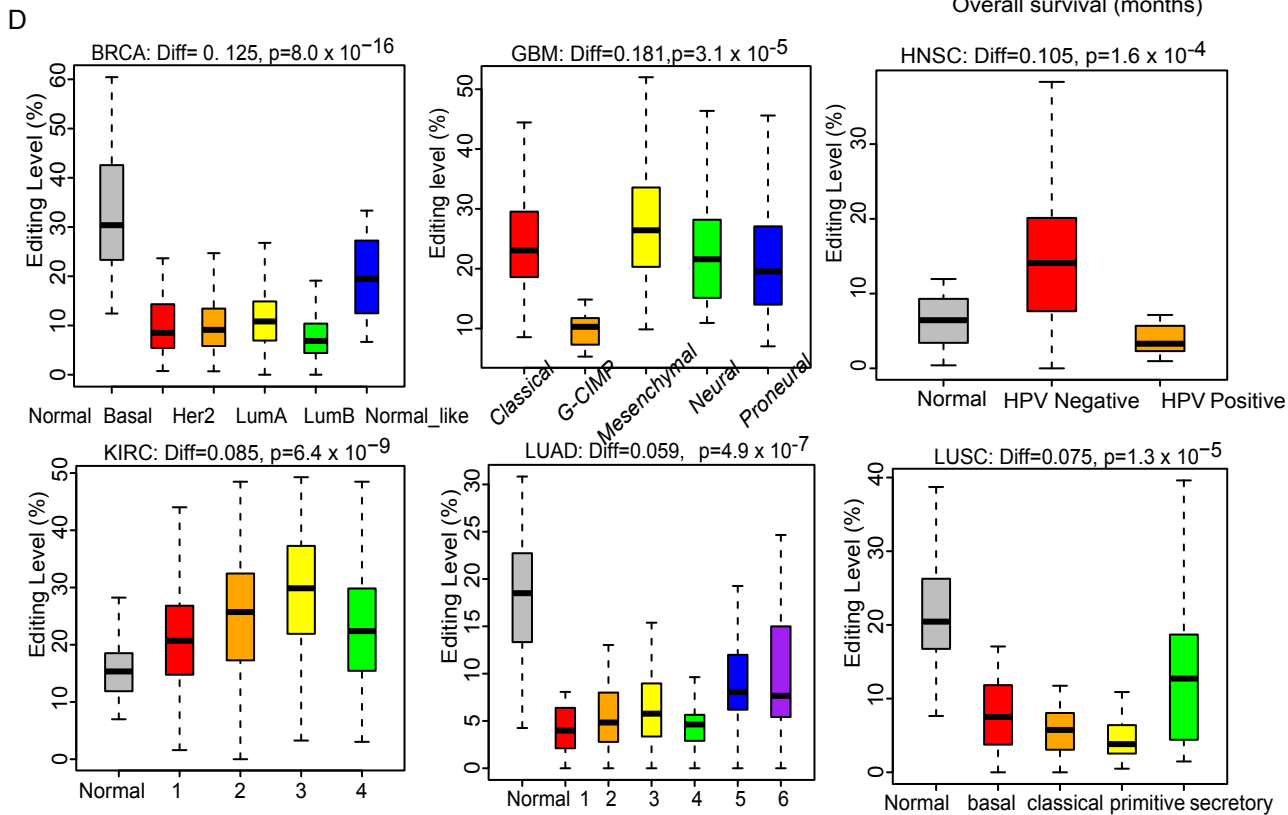

**F**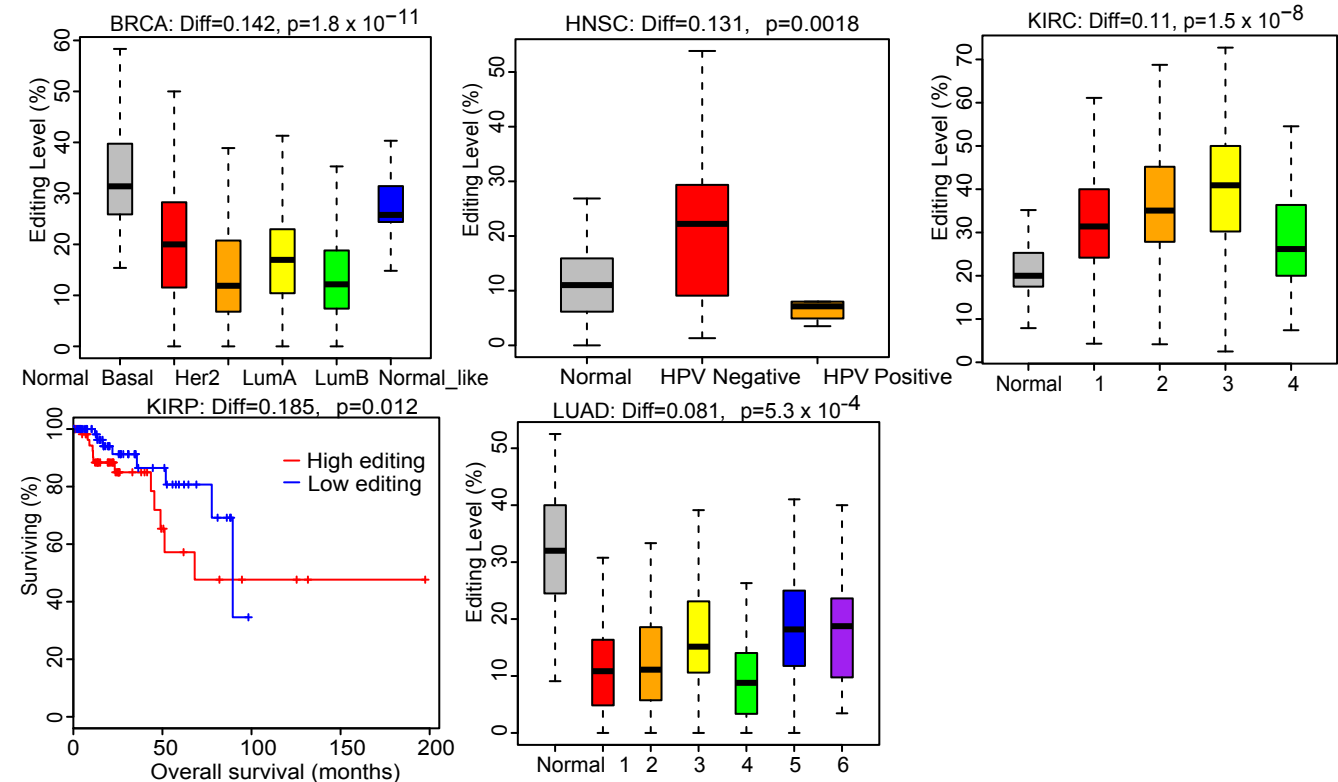**F**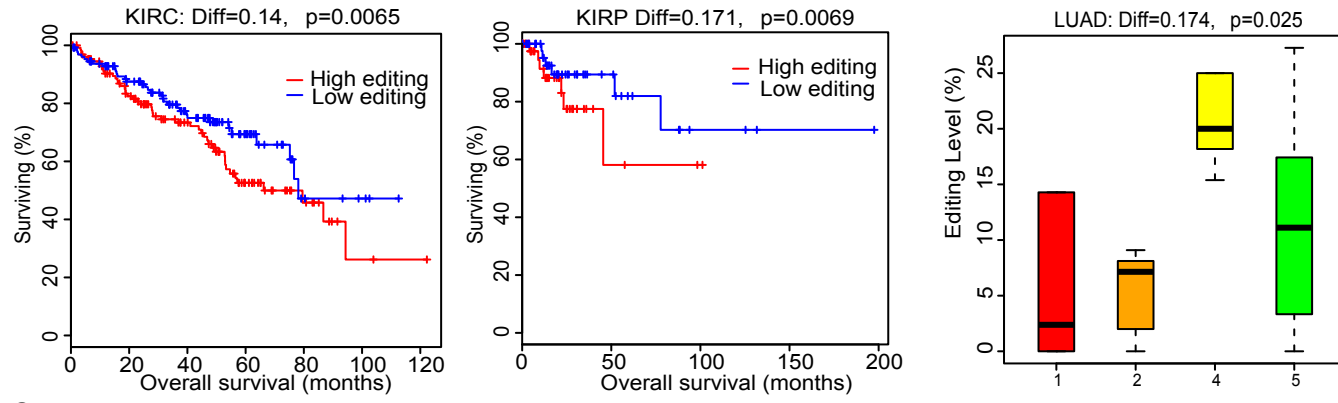**G**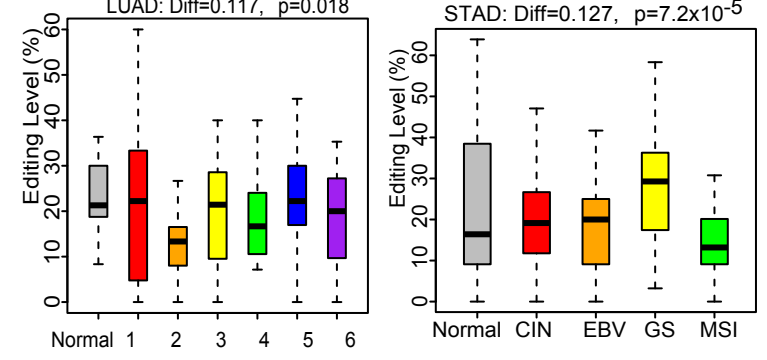**H**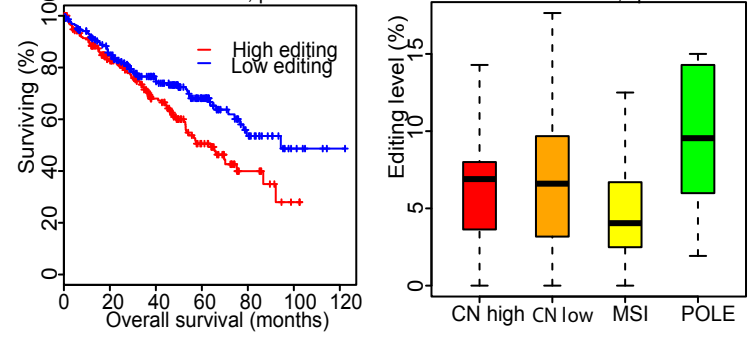**I**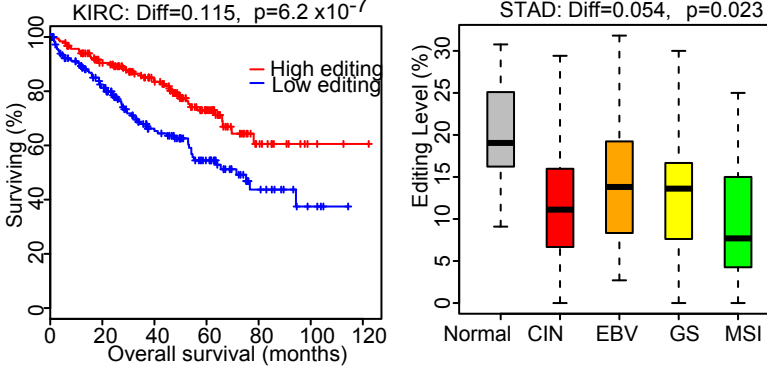

**Figure S2 Nonsynonymous RNA editing sites with cross-tumor relevance. Related to Figure 4.**

(A) A pie chart showing the distribution of nonsynonymous RNA sites with cross-tumor clinical relevance. (B) The clinical relevance of the four top RNA editing candidates based on the analysis of the amount of edited transcripts. (C-I) Cross-tumor clinical relevance of nonsynonymous A-to-I RNA editing sites. *AZIN1* S367G (C), *COPA* I164V (D), *COG3* I635V (E), *ACBD4* T262A (F), *PPIL3* S59G (G), *BLCAP* Q5R (H) and *PODXL* H241R (I). The boxes show the median $\pm$ 1 quartile, with whiskers extending to the most extreme data point within 1.5 interquartile range from the box boundaries.

**Table S3, related to Figure 4. Provided as an Excel file.**

A

## COPA I164V

cDNA

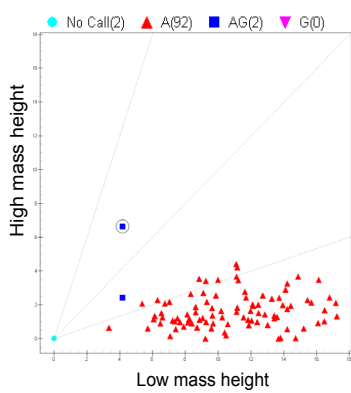

gDNA

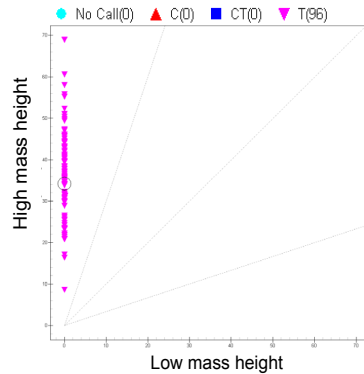

cDNA

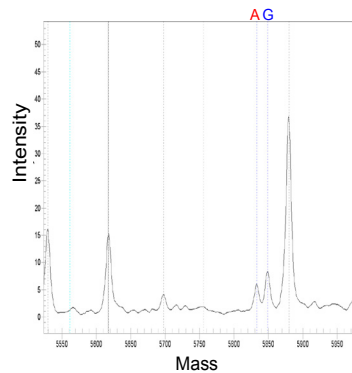

gDNA

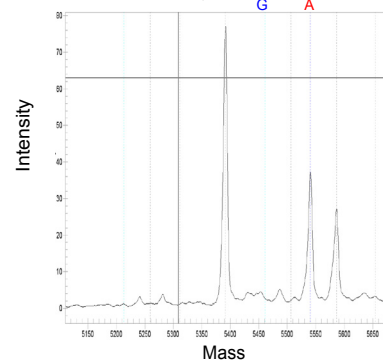

## COG3 I635V

cDNA

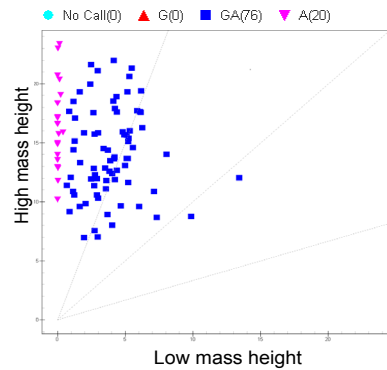

gDNA

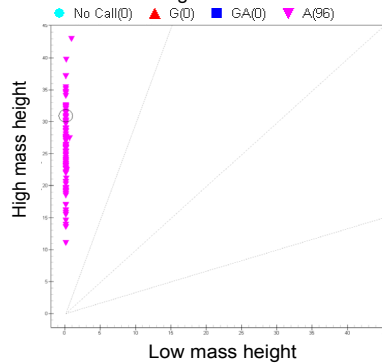

cDNA

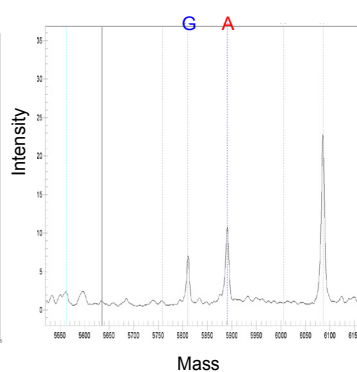

gDNA

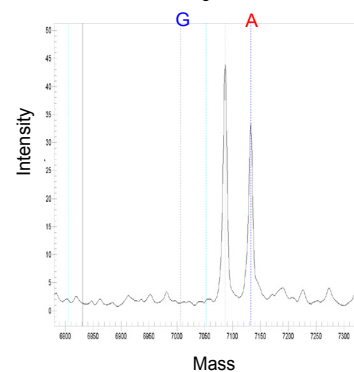

## GRIA2 R764G

cDNA

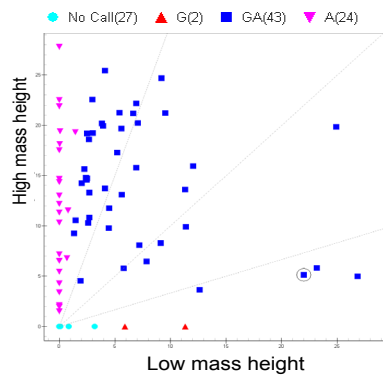

gDNA

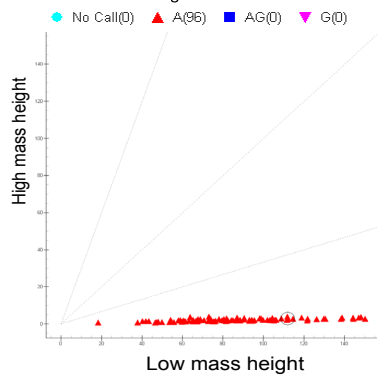

cDNA

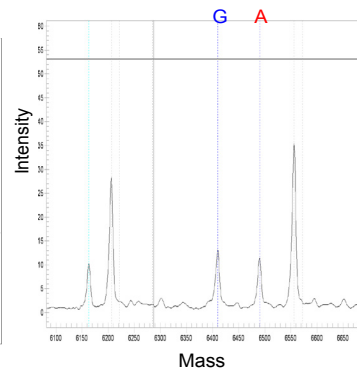

gDNA

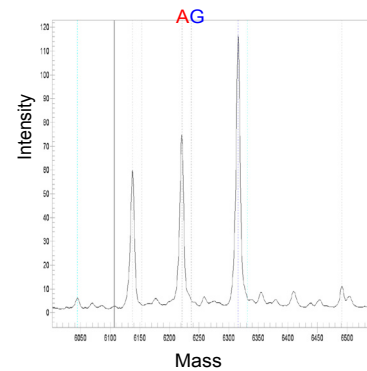

B

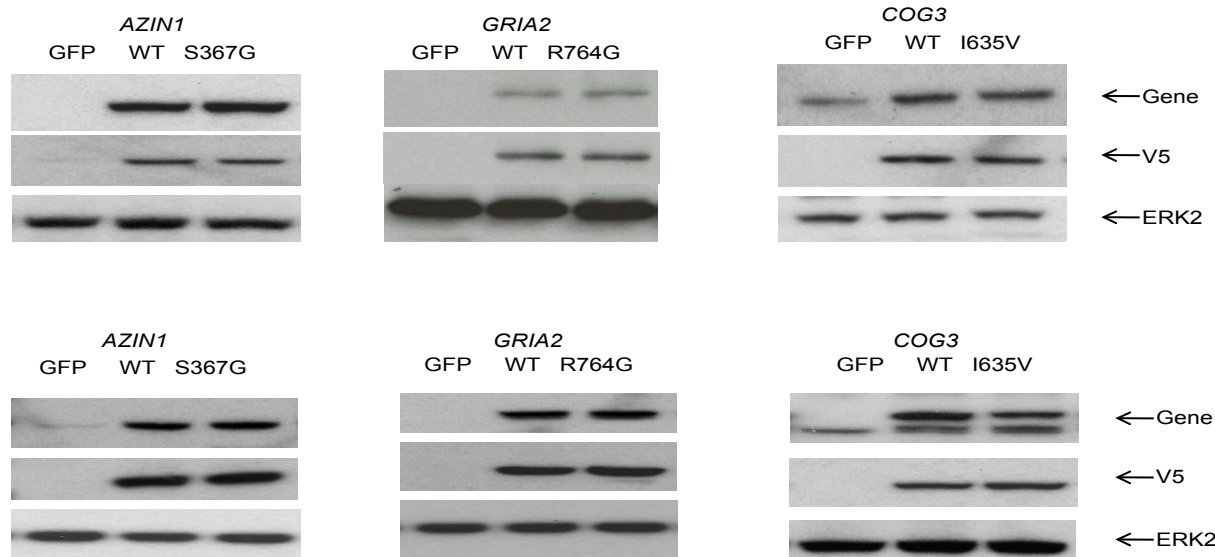

C

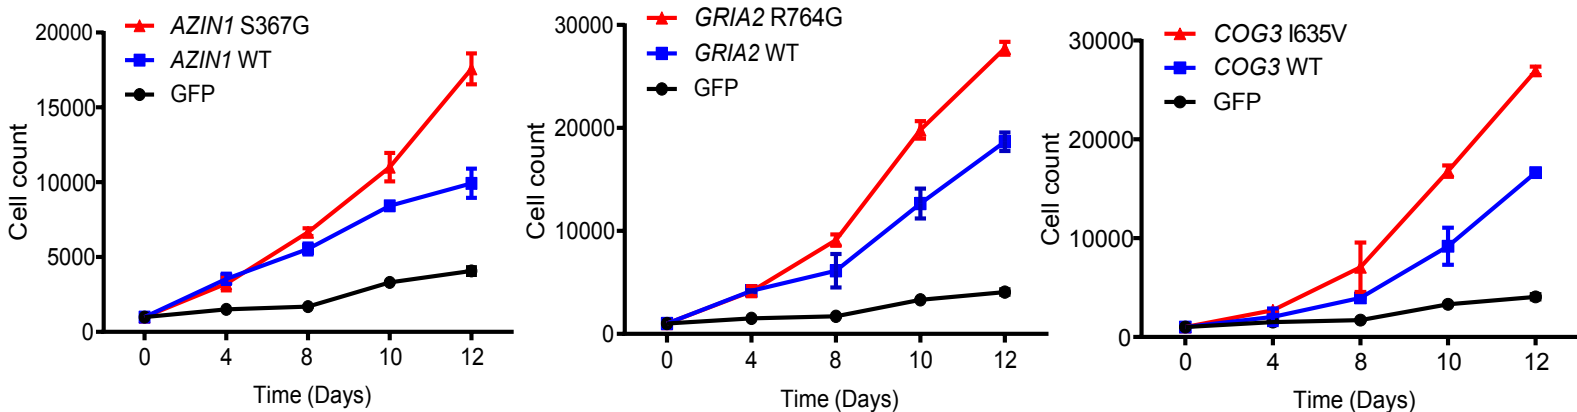

D

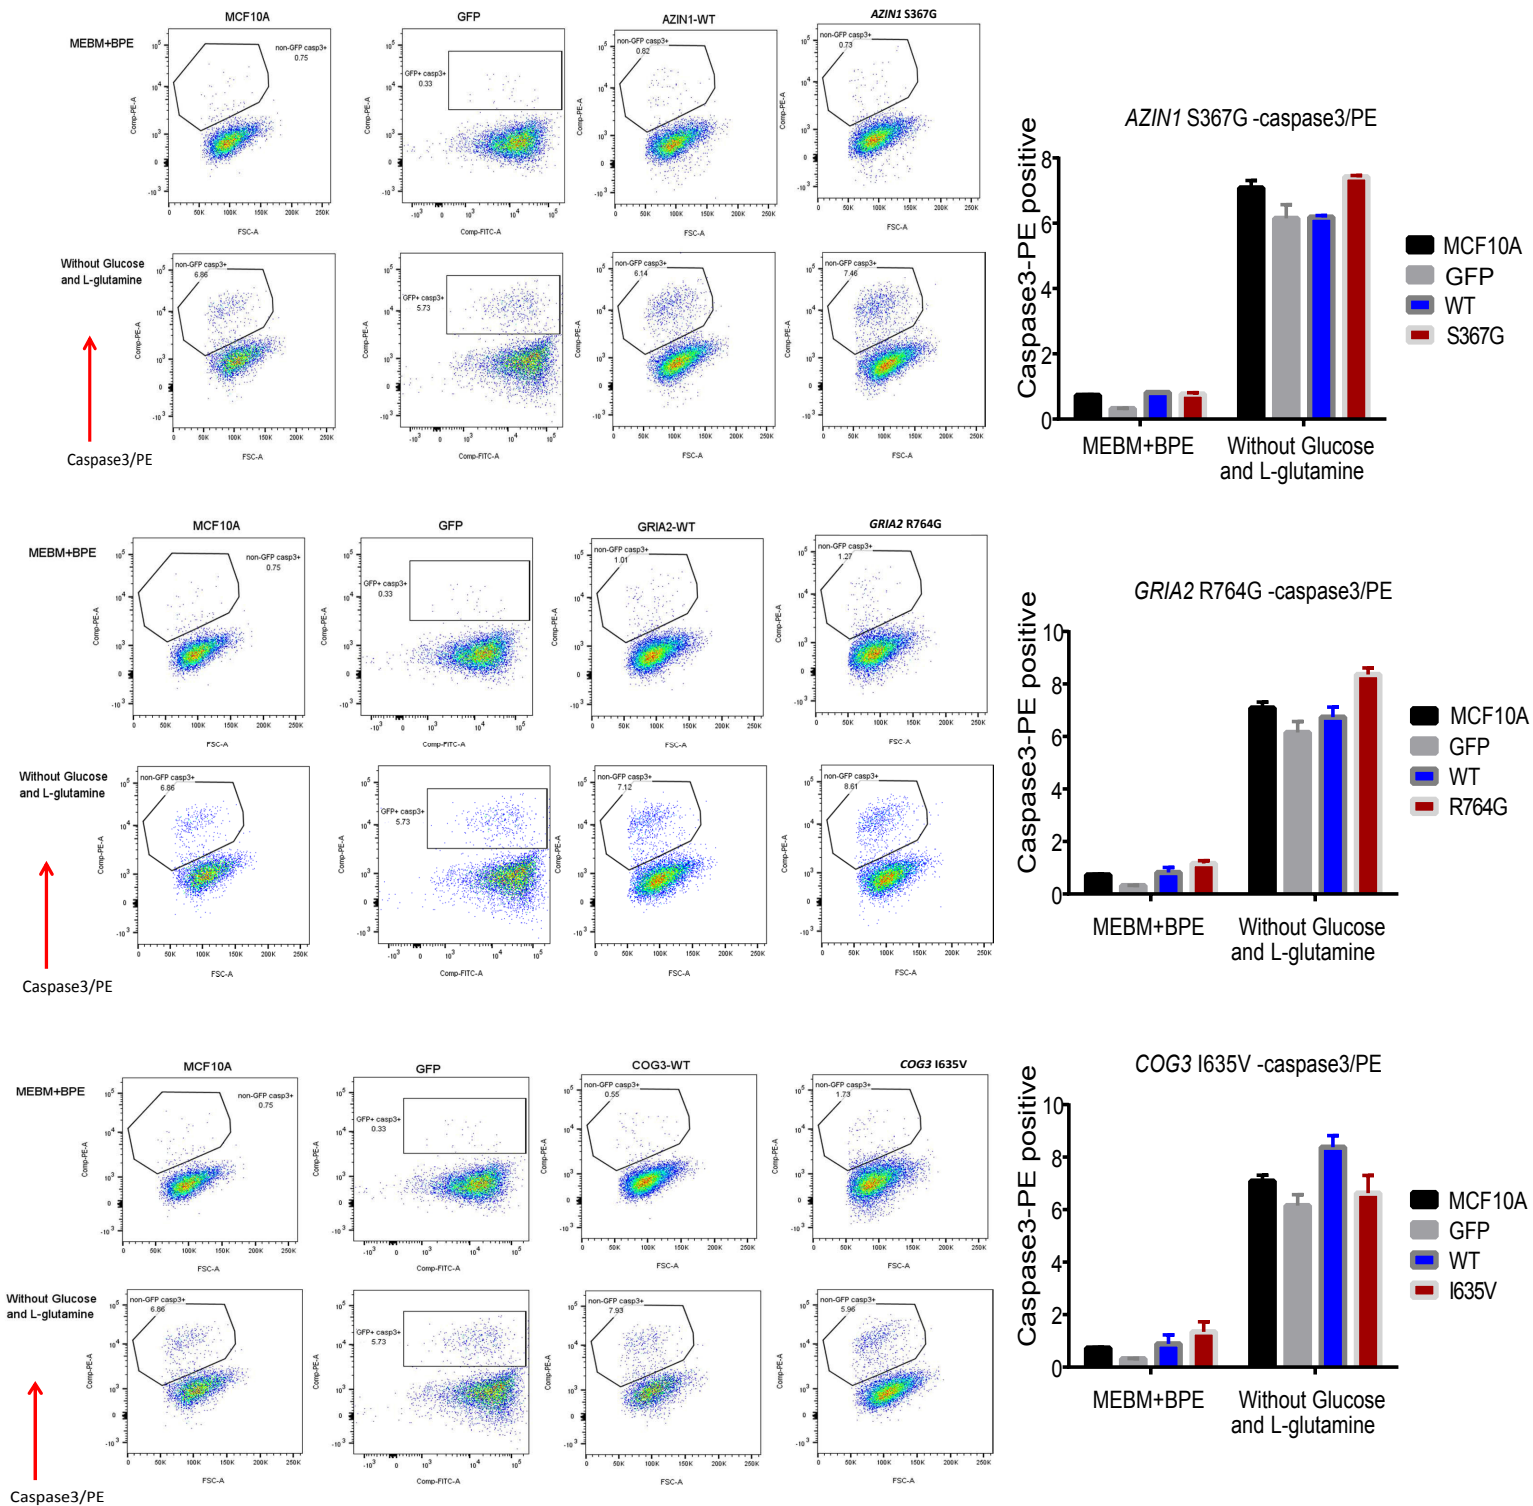

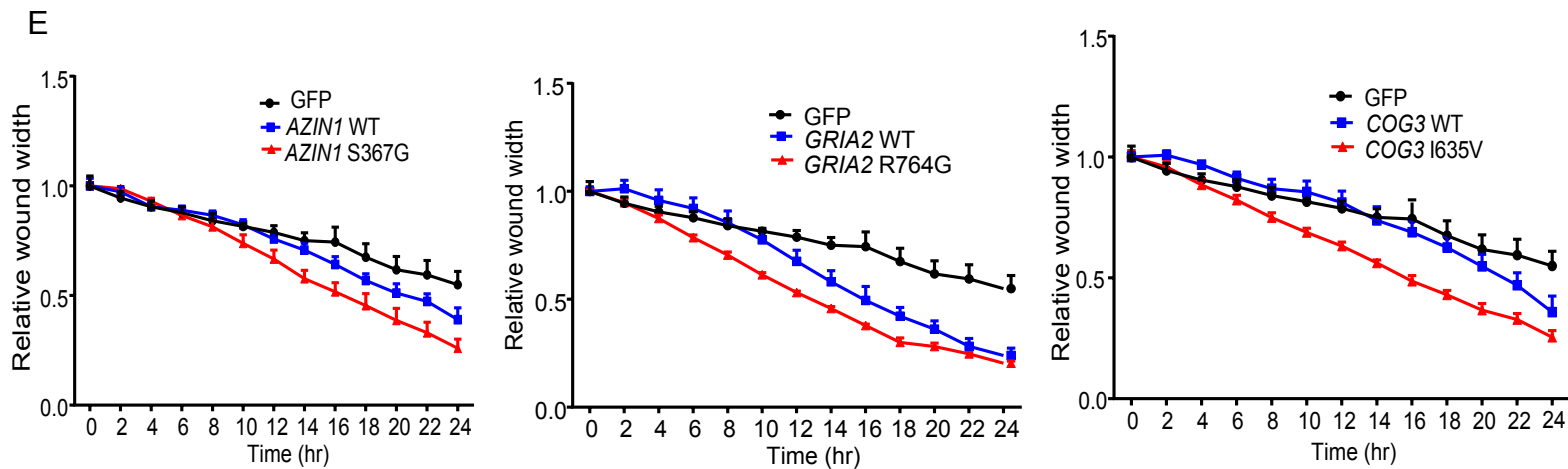

**Figure S3 Experimental assays for selected nonsynonymous RNA editing sites. Related to Figure 5.**

(A) Sequenom validation of *GRIA2* R764G, *COG3* I635V, and *COPA* I164V. For each gene, the upper panels show the results of a group of samples at cDNA and gDNA, respectively, where each blue symbol represents the AG genotype of a sample; while the bottom panels show the results of an individual sample in cDNA and gDNA, respectively, where there are one "A" peak and one "G" peak in cDNA but only one "A" peak in gDNA. (B) Western blots of the wild-type and the mutants of *AZIN1* S367G, *GRIA2* R764G and *COG3* I635V in stable MCF10A cell line and stable BaF3 cell line. (C) The effects of *AZIN1* S367G, *GRIA2* R764G and *COG3* I635V in MCF10A cell viability assays based on cell counts. Error bars denote +/- SEM. (D) The effects of *AZIN1* S367G, *GRIA2* R764G and *COG3* I635V in MCF10A apoptosis assays. MCF10A cells with different transfections (GFP, WT, and edited form) were subjected to serum starvation (MEGM and BPE) or serum starvation without Glucose and L-glutamine for 24 h to induce apoptosis. Apoptotic cells were assessed via flow cytometric analysis using PE-conjugated active caspase 3 antibody. PE active caspase 3 positive cells were gated for flow cytometry analysis. The percentage of cells exhibiting active caspase 3 is indicated on each histogram as the mean +/- SEM of three replicated experiments. (E) The effects of *AZIN1* S367G, *GRIA2* R764G and *COG3* I635V in MCF10A wound healing assays. Error bars denote +/- SEM.
